# Supplementary material
Source: PubMed Central journal article supplement (PMC3268651)

# Supplemental dataS1

A)

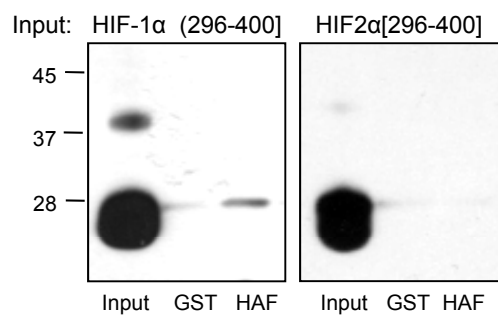

B)

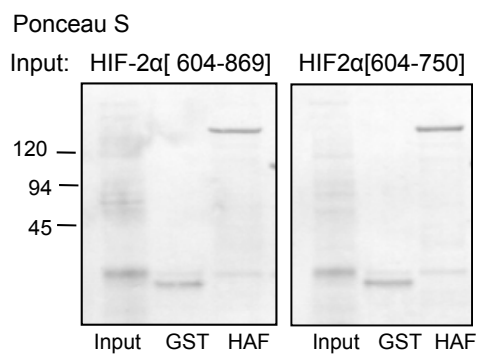

## Supplemental dataS2

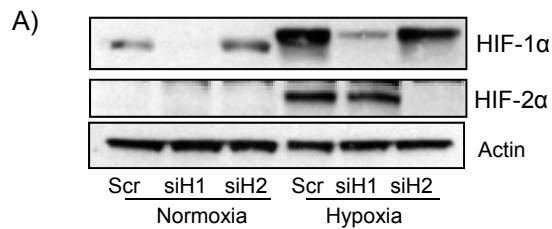

B) i) HIF-1α target genes

| Gene Symbol | Fold-Change (HypHIF-1 vs. NorScr) | Fold-Change (HypHIF-2 vs. NorScr) | Fold-Change (HypScr vs. NorScr) |
|-------------|-----------------------------------|-----------------------------------|---------------------------------|
| PDK1        | 3.01                              | 6.39                              | 5.72                            |
| BNIP3L      | 2.29                              | 4.09                              | 4.14                            |
| CA9         | 2.54                              | 20.16                             | 23.64                           |
| DDIT4       | 2.58                              | 4.27                              | 4.96                            |
| ENO2        | 2.50                              | 7.35                              | 7.83                            |
| ALDOC       | 6.22                              | 22.72                             | 22.88                           |
| TXNIP       | ?                                 | 4.50                              | 4.63                            |
| BNIP3       | ?                                 | 3.70                              | 3.60                            |
| ADM         | ?                                 | 4.07                              | 4.14                            |
| MAP2K1      | ?                                 | 2.01                              | 2.06                            |
| DUSP3       | ?                                 | 2.06                              | 2.07                            |
| COL1A1      | ?                                 | 2.32                              | 2.09                            |
| ENOSF1      | ?                                 | 2.13                              | 2.15                            |
| GPI         | ?                                 | 2.84                              | 3.10                            |
| PFKL        | ?                                 | 2.54                              | 2.82                            |
| PGK1        | ?                                 | 2.38                              | 2.39                            |

ii) HIF-2α target genes

| Gene Symbol | Fold-Change (HypHIF-1 vs. NorScr) | Fold-Change (HypHIF-2 vs. NorScr) | Fold-Change (HypScr vs. NorScr) |
|-------------|-----------------------------------|-----------------------------------|---------------------------------|
| SERPINE1    | 2.17                              | ?                                 | 2.66                            |

iii) HIF-1/2α target genes

| Gene Symbol | Fold-Change (HypHIF-1 vs. NorScr) | Fold-Change (HypHIF-2 vs. NorScr) | Fold-Change (HypScr vs. NorScr) |
|-------------|-----------------------------------|-----------------------------------|---------------------------------|
| PTGS2       | 2.27                              | 4.36                              | 6.23                            |
| IGFBP5      | 2.17                              | 3.96                              | 5.11                            |
| CP          | 3.38                              | 4.60                              | 7.64                            |
| VEGFA       | 4.04                              | 7.08                              | 8.10                            |
| IGFBP3      | 2.03                              | 3.03                              | 4.96                            |
| NDRG1       | 5.27                              | 9.84                              | 11.51                           |
| SLC2A3      | 2.21                              | 3.30                              | 4.07                            |
| ANGPTL4     | 2.55                              | 9.43                              | 12.47                           |
| AK3L1       | ?                                 | ?                                 | 2.18                            |
| EFR3B       | ?                                 | ?                                 | 2.29                            |
| DDIT4L      | ?                                 | ?                                 | 2.01                            |
| LOXL2       | ?                                 | ?                                 | 2.14                            |
| PTGES       | ?                                 | ?                                 | 2.63                            |
| PYGL        | ?                                 | ?                                 | 2.08                            |
| IGF1R       | ?                                 | ?                                 | 2.59                            |
| RARA        | ?                                 | ?                                 | 2.33                            |
| TGM2        | ?                                 | ?                                 | 2.51                            |
| CITED1      | ?                                 | ?                                 | 3.18                            |

IV) HIF independent genes

| Gene Symbol | Fold change (HypHIF-1 vs. NorScr) | Fold change (HypHIF-2 vs. Nor Scr) | Fold change (HypScr vs. Nor Scr) |
|-------------|-----------------------------------|------------------------------------|----------------------------------|
| CBS         | 3.00                              | 3.52                               | 3.30                             |
| PRELP       | 2.45                              | 4.31                               | 2.97                             |
| DPY19L2P2   | 3.42                              | 4.41                               | 2.81                             |
| PCK2        | 2.22                              | 2.52                               | 2.67                             |
| JMJD1A      | 2.07                              | 3.13                               | 2.53                             |
| HERC1       | 2.02                              | 2.24                               | 2.37                             |
| FREM2       | 2.45                              | 2.17                               | 2.34                             |
| CHAC1       | 4.22                              | 2.99                               | 2.31                             |
| ASNS        | 2.23                              | 2.62                               | 2.16                             |

# Supplemental dataS3

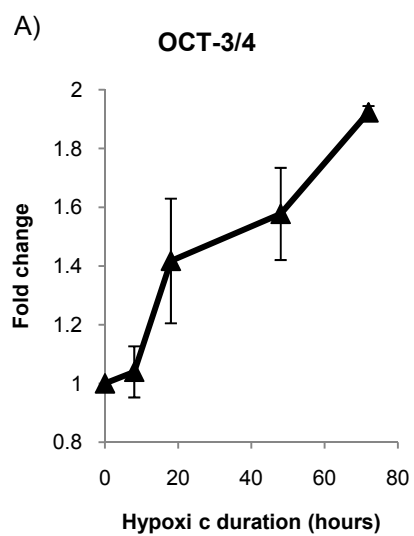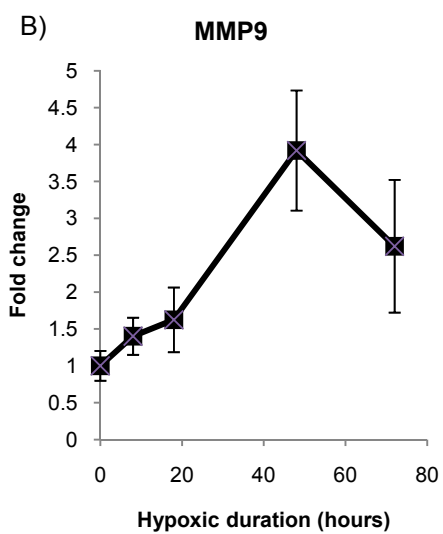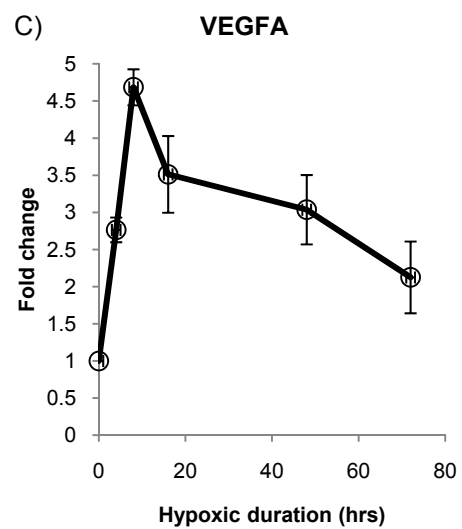

Supplemental dataS4

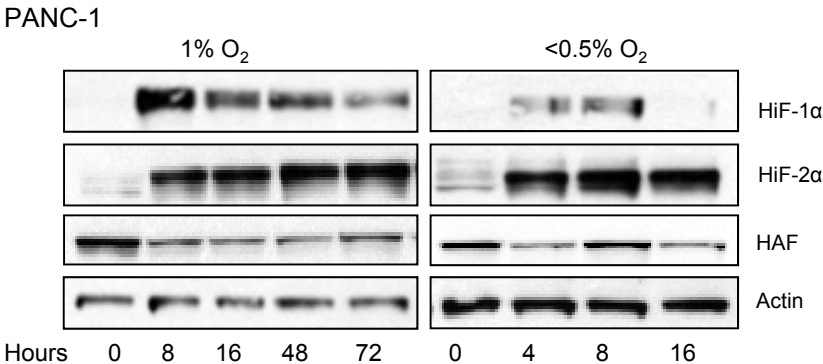

## Supplemental dataS5

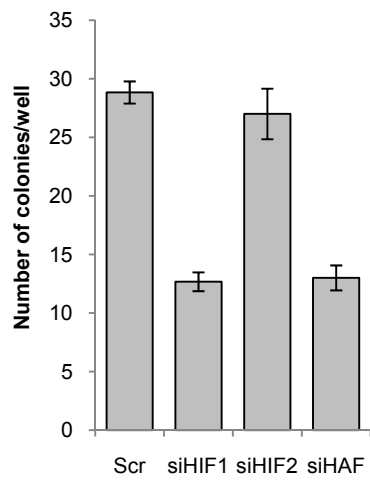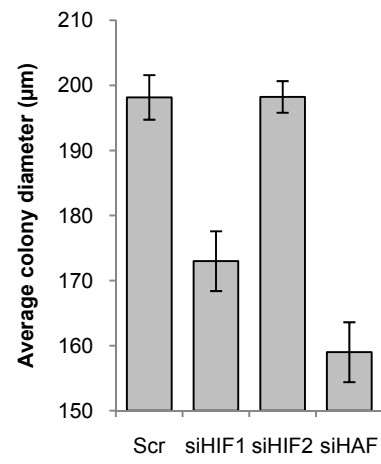

PANC-1

Control (+ serum)

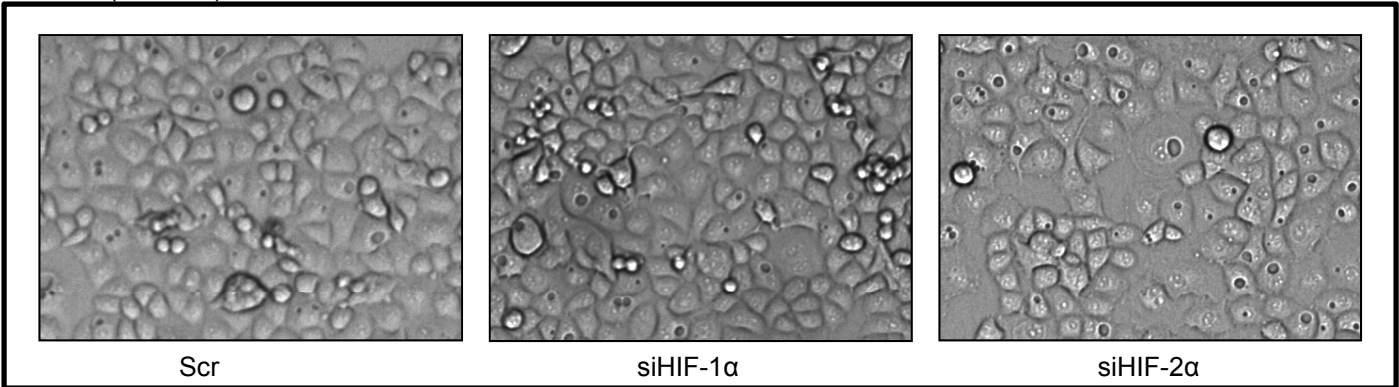

+10ng/ml TGFβ for 48 hours

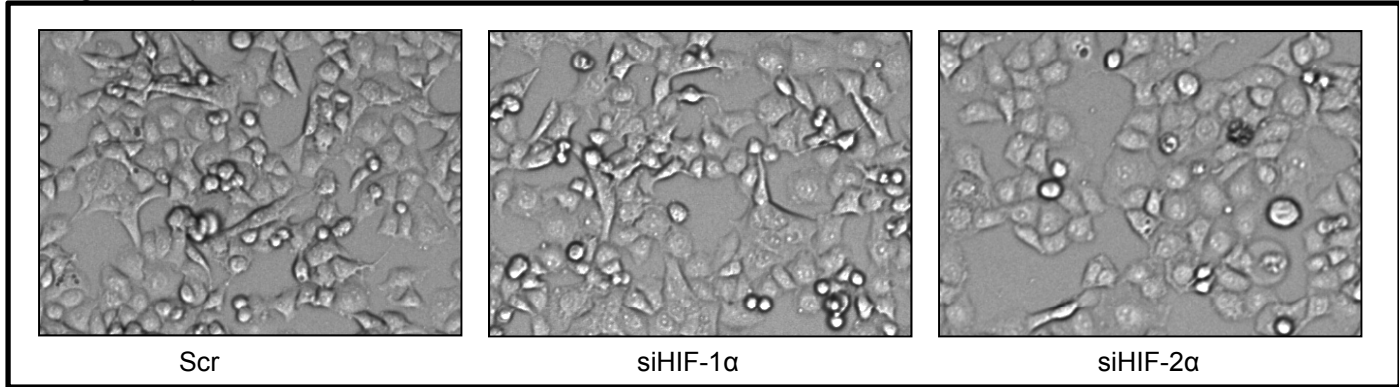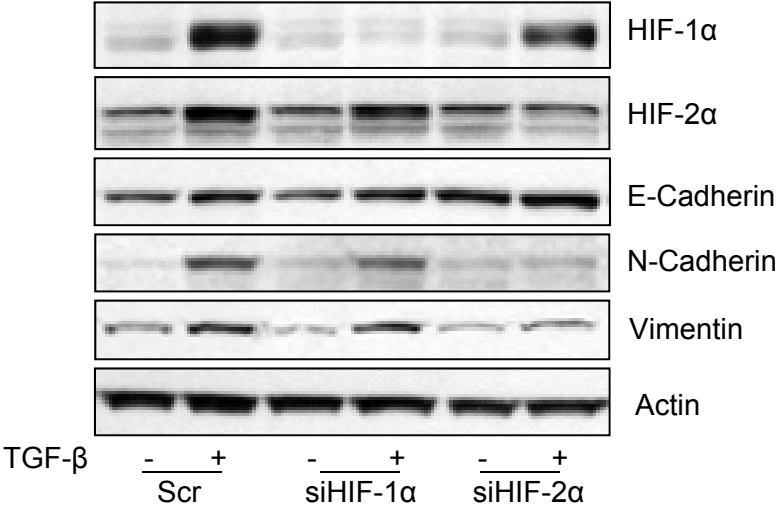

## Supplemental dataS7

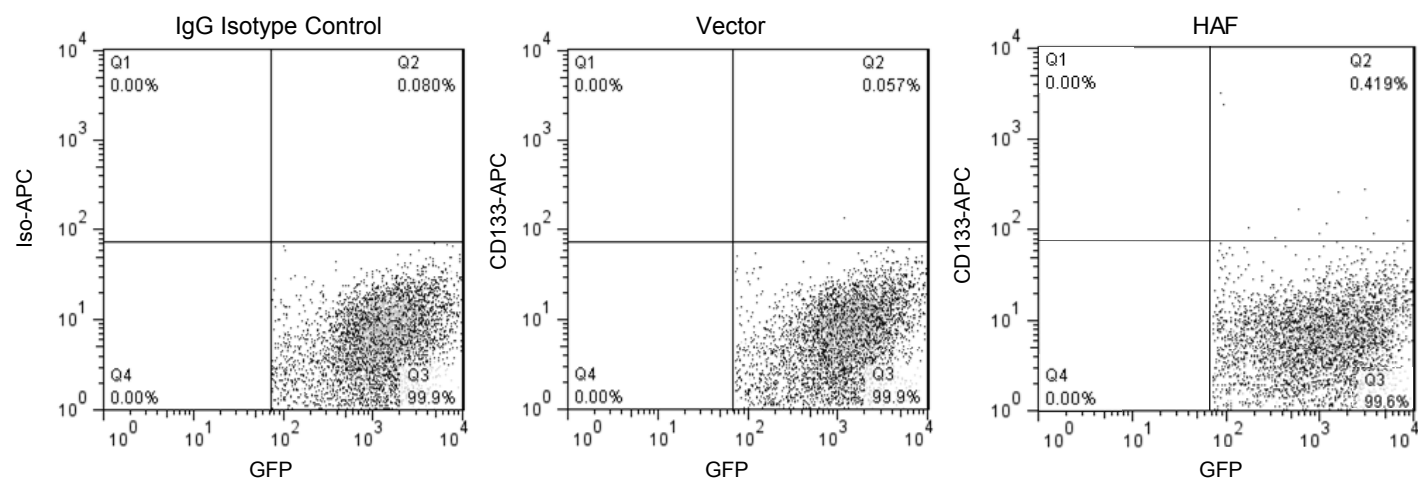

Supplement: NIHMS343539-supplement-Fig1-7.pdf [file NIHMS343539-supplement-Fig1-7.pdf]
